# Supplementary material for: The Evolution of Polarization in Online Conversation: Twitter Users’ Opinions about the COVID-19 Pandemic Become More Politicized over Time
Source: Hindawi journal article supplement (doi:10.1155/2023/9094933), 2023-07-05
Supplement: f1 [file 9094933.f1.docx]

**Supplementary Information**

**The evolution of polarization in online conversation: Twitter users’ opinions about the COVID-19 pandemic become more politicized over time**

**Topic modelling methodology**

Study 1 employs the MALLET LDA topic modelling toolkit to classify approximately 30M tweets into 35 different topics. We use the *LDAvis* R package to visualize the results of classification, and Figure S2 shows two topics (police|cop|arrest|shoot|riot and test|covid|virus|death|case). The distance between circles in the intertopic distance map indicates similarity between topics, and bar charts show the frequency for each relevant token in the estimated topic. Readers can download the ‘*topics*’ file we updated in the supplemental material to obtain the interactive version (this requires two R packages: *LDAvis* and *servr*, then running the code ‘*serVis(json)*’).

**Analysis of other topics**

Before measuring the intensity of polarization with Leave-out estimators (Gentzkow et al., 2019), we first test whether this algorithm can reflect partisan differences in our dataset. Figure S3 gives the leave-out estimators for the test|covid|virus|death|case topic, where the blue curve represents the situation when Twitter users are randomly attached to either Democratic or Republican group (the red curve is the same as the one shown in Panel A of Figure 3). Leave-out estimators for random classification are close to .5 for each week, while for partisan classification they are significantly higher than .5.

Figure 3 in the main text shows the polarization in vocabulary usage for six topics about the COVID-19 pandemic, the U.S. presidential election and BLM social activities. Here we give the changes of leave-out estimators and linear regression outcomes for the remaining 29 topics in Study 1, including 13 topics about political issues and social problems in Figure S4 and Table S5, and 16 non-political topics in Figure S5 and Table S6.

| Republican | @AllenWest (827K), @AppSame (388K), @DanCrenshawTX (1.1M), @FoxNews (22.1M), @glennbeck (1.4M), @GOP (2.7M), @GOPLeader (1.1M), @Heritage (679K), @HouseGOP (1M), @IngrahamAngle (3.9M), @marklevinshow (2.8M) @MarkMeadows (900K), @michaeljohns (235K), @michellemalkin (2.2M), @newtgingrich (2.4M), @POTUS45 (33.1M), @RealJamesWoods (2.4M), @RedState (258K), @SarahPalinUSA (1.5M),@seanhannity (5.3M), @SenateGOP (1.2M), @SenTedCruz (2.1M), @SpeakerBoehner (1.3M), @SteveScalise (467K), @TuckerCarlson (4.4M), @VP45 (10.2M), |
| --- | --- |
| Democrat | @AOC (12.7M), @CoryBooker (4.7M), @DavidCornDC (912K) , @DNC (122.5K), @donnabrazile (674K), @DWStweets (357K), @HillaryClinton (30.9M), @HouseDemocrats (1.1M), @jaketapper (3M), @JerryBrownGov (1M), @JoeBiden (30.1M), @justinamash (466K), @KamalaHarris (12.5M), @laurenduca (403K), @MichelleObama (20.6M), @MSNBC (3.8M), @Politics_PR (221K), @POTUS44 (14.5M), @RepAdamSchiff (2.7M), @RepJayapal (362K), @SenateDems (1.1M), @SenSchumer (2.7M), @SenWarren (6.5M), @SpeakerPelosi (6M), @StephenAtHome (19.4M), @TheDemocrats (2M) |

Table S1. Lists of conservative (Republican) and liberal (Democrat) seed accounts. Numbers in parentheses show the number of followers by the time of collection.

| Political topics | | Non-political topics | |
| --- | --- | --- | --- |
| theme | representative tokens | theme | representative tokens |
| Protest | police|cop|arrest|shoot|riot | Communication | people|opinion|understand|point|question |
| Election | ballot|vote|election|georgia|voter | Emotion | yall|lol|shit|guy|fuck |
| COVID-19 | test|covid|virus|death|case | Daily life | day|wait|time|hour|sleep |
| Public health | life|feel|wearmask|people|mental | Sports | game|player|team|play|football |
| Racism | black|white|racist|racism|blackpeople | Market | market|company|climate|industry|technology |
| Medical system | vaccine|doctor|hospital|patient|medical | Entertainment | book|movie|read|write|film |
| Rude criticism | fuck|stupid|idiot|trump|ass | Family & friend | love|happy|family|happybirthday|beautiful |
| Economy | pay|money|tax|fund|billion | Fashion | wear|dog|hair|cat|mask |
| Ideology | party|america|country|socialism|socialist | Traffic | car|park|driver|drive|truck |
| Government | trump|president|donaldtrump|democracy|coup | Showbiz | john|michael|king|david|taylor |
| National security | fbi|russian|investigation|hunterbiden|russia | Social Media | twitter|retweet|account|tweet|post |
| Candidates | biden|debate|joebiden|joe|bernie | Online activity | join|event|virtual|host|register |
| Senate election | senate|senator|republican|house|congress | Religion | god|jesus|lord|pray|church |
| Media | medium|cnn|news|foxnews|fakenews | Education | school|student|teacher|college|teach |
| Show respect | fight|honor|stand|veteran|american | Tourism | postphoto|coast|storm|san|lake |
| States | governor|gov|state|cuomo|order | Cooking | eat|food|drink|chicken|coffee |
| Global | china|india|muslim|israel|peace |  |  |
| Women & children | child|woman|sex|rape|abortion |  |  |
| Africa | nigeria|nigerian|lagos|dey|buhari |  |  |

Table S2. Representative tokens for each of 35 topics.

|  | test|covid|virus|  death|case | | life|feel|wearmask|  people|mental | | vaccine|doctor|hospital|  patient|medical | | police|cop|arrest|  shoot|riot | | black|white|racist|  racism|blackpeople | | ballot|vote|election|  georgia|voter | |
| --- | --- | --- | --- | --- | --- | --- | --- | --- | --- | --- | --- | --- |
|  | **include rt** | **exclude rt** | **include rt** | **exclude rt** | **include rt** | **exclude rt** | **include rt** | **exclude rt** | **include rt** | **exclude rt** | **include rt** | **exclude rt** |
| Intercept *β0* | .555 | .516 | .528 | .511 | .567 | .519 | .584 | .526 | .581 | .527 | .595 | .518 |
|  | (.004) | (.001) | (.002) | (.001) | (.005) | (.002) | (.007) | (.004) | (.005) | (.002) | (.006) | (.002) |
| *β1* | **6.787e-04***** | **3.076e-04***** | **2.227e-04***** | **1.032e-04***** | 2.965e-04. | **1.103e-04*** | 4.504e-04. | **3.167e-04*** | 3.110e-04 | 9.807e-05 | 3.334e-04 | **4.615e-04***** |
|  | (1.308e-04) | (5.100e-05) | (6.983e-05) | (2.017e-05) | (1.571e-04) | (5.184e-05) | (2.519e-04) | (1.465e-04) | (1.858e-04) | (6.223e-05) | (2.164e-04) | (5.835e-05) |
| R2 | .359 | .431 | .175 | .353 | .007 | .086 | .062 | .089 | .055 | .005 | .047 | .566 |
| Adjusted R2 | .346 | .419 | .158 | .339 | .005 | .067 | .043 | .070 | .035 | .003 | .027 | .557 |
| *F (p)* | 26.914 (<.001) | 36.375  (<.001) | 10.168  (.003) | 26.148  (<.001) | 3.561  (.065) | 4.528  (.039) | 3.197  (.080) | 4.676  (.036) | 2.800  (.101) | 2.484  (.122) | 2.734  (0.130) | 62.553  (<.001) |

Notations: ‘.’ for *p<.1*, ‘*’ for *p<.05*, ‘**’ for *p<.01* and ‘***’ for *p<.001*.

Table S3. Linear regression outcomes for week-based leave-out estimators for topics about COVID-19, BLM activity and the 2020 election. All significant *β1* estimators with *p<.05* are written in bold for this and remaining tables in this document.

|  | test|covid|virus|  death|case | life|feel|wearmask|  people|mental | vaccine|doctor|hospital|  patient|medical | police|cop|arrest|  shoot|riot | black|white|racist|  racism|blackpeople | ballot|vote|election|  georgia|voter |
| --- | --- | --- | --- | --- | --- | --- |
| Intercept *β0* | .569  (.004)  **3.422e-04*****  (6.839e-05) | .534  (.002)  8.017e-05.  (4.274e-05) | .571  (.005)  **3.171e-04*****  (7.931e-05) | .651  (.006)  9.609e-05  (9.946e-05) | .624  (.004)  3.241e-05  (7.172e-05) | .633  (.004)  6.097e-05  (9.286e-05) |
|  |
| *β1* |
|  |
| R2 | .204  .195  25.033  (<.001) | .035  .025  3.518  (.064) | .140  .132  15.987  (<.001) | .009  -.001  0.934  (.336) | .002  -.008  0.204  (.652) | .006  -.007  0.431  (.513) |
| Adjusted R2 |
| *F (p)* |

Notations: ‘.’ for *p<.1*, ‘*’ for *p<.05*, ‘**’ for *p<.01* and ‘***’ for *p<.001*.

Table S4. Linear regression outcomes for day-based leave-out estimators after trigger events for topics about COVID-19, BLM activity and the 2020 election.

|  | 1.fuck|stupid|idiot|  trump|ass | | 2.pay|money|tax|  fund|billion | | 3.party|america|country|  socialism|socialist | | 4.trump|president|donaldtrump|democracy|coup | | 5.fbi|russian|investigation|hunterbiden|russia | | 6.biden|debate|joebiden|  joe|bernie | |
| --- | --- | --- | --- | --- | --- | --- | --- | --- | --- | --- | --- | --- |
|  | **include rt** | **exclude rt** | **include rt** | **exclude rt** | **include rt** | **exclude rt** | **include rt** | **exclude rt** | **include rt** | **exclude rt** | **include rt** | **exclude rt** |
| Intercept *β0* | .547 | .528 | .576 | .519 | .565 | .529 | .602 | .528 | .638 | .534 | .580 | .533 |
|  | (.001) | (.001) | (.004) | (.002) | (.002) | (.008) | (.004) | (.001) | (.004) | (.002) | (.003) | (.001) |
| *β1* | 6.971e-05 | **1.313e-04***** | 1.069e-04 | **1.212e-04*** | -2.507e-07 | **5.768e-05*** | -**2.776e-04*** | **1.543e-04***** | -1.213e-04 | **5.801e-04***** | **3.289e-04**** | **1.030e-04*** |
|  | (5.926e-05) | (3.354e-05) | (1.399e-04) | (5.770e-05) | (7.253e-05) | (2.636e-05) | (1.262e-04) | (4.238e-05) | (1.519e-04) | (6.961e-05) | (1.176e-04) | (4.191e-05) |
| R2 | .028 | .242 | .012 | .084 | <.001 | .090 | .092 | .217 | .013 | .591 | .140 | .112 |
| Adjusted R2 | .007 | .226 | -.009 | .065 | -.021 | .072 | .073 | .200 | -.007 | .583 | .122 | .093 |
| *F (p)* | 1.384  (.245) | 15.325  (<.001) | 0.583  (.449) | 4.414  (.041) | <.001  (.997) | 4.788  (.034) | 4.838  (.033) | 13.264  (<.001) | 0.638  (.428) | 69.442  (<.001) | 7.823  (.007) | 6.044  (.018) |

|  | 7.senate|senator|  republican|house|congress | | 8.medium|cnn|news|  foxnews|fakenews | | 9.fight|honor|stand|  veteran|american | | 10.governor|gov|state|  cuomo|order | | 11.china|india|muslim|  israel|peace | | 12.child|woman|sex|  rape|abortion | |
| --- | --- | --- | --- | --- | --- | --- | --- | --- | --- | --- | --- | --- |
|  | **include rt** | **exclude rt** | **include rt** | **exclude rt** | **include rt** | **exclude rt** | **include rt** | **exclude rt** | **include rt** | **exclude rt** | **include rt** | **exclude rt** |
| Intercept *β0* | .640 | .538 | .580 | .528 | .592 | .532 | .587 | .525 | .571 | .523 | .600 | .523 |
|  | (.006) | (.002) | (.003) | (.001) | (.006) | (.002) | (.005) | (.002) | (.006) | (.002) | (.006) | (.002) |
| *β1* | **-4.589e-04*** | -7.680e-06 | 7.150e-05 | 1.097e-04* | 3.458e-04 | **2.924e-04**** | 2.658e-04. | **1.548e-04**** | **4.037e-04*** | 1.288e-04 | 2.700e-04 | **1.511e-04**** |
|  | (2.178e-04) | (6.290e-05) | (1.008e-04) | (4.923e-05) | (2.119e-04) | (8.433e-05) | (1.560e-04) | (5.684e-05) | (1.938e-04) | (5.285e-05) | (2.036e-04) | (5.619e-05) |
| R2 | .084 | <.001 | .010 | .094 | .053 | .200 | .057 | .134 | .082 | .110 | .035 | .131 |
| Adjusted R2 | .065 | -.021 | -.010 | .075 | .033 | .184 | .037 | .116 | .064 | .092 | .015 | .113 |
| *F (p)* | 4.402  (.041) | 0.015  (.903) | 0.503  (.482) | 4.963  (.031) | 2.665  (.109) | 12.026  (.001) | 2.904  (.095) | 7.414  (.009) | 4.340  (.043) | 5.941  (.019) | 1.758  (.191) | 7.234  (.010) |

|  | 13.nigeria|nigerian|lagos|  dey|buhari | |  | |  | |  | |  | |  | |
| --- | --- | --- | --- | --- | --- | --- | --- | --- | --- | --- | --- | --- |
|  | **include rt** | **exclude rt** |  |  |  |  |  |  |  |  |  |  |
| Intercept *β0* | .538 | .512 |  |  |  |  |  |  |  |  |  |  |
|  | (.009) | (.002) |  |  |  |  |  |  |  |  |  |  |
| *β1* | 1.805e-04 | -1.142e-04 |  |  |  |  |  |  |  |  |  |  |
|  | (3.240e-04) | (7.780e-05) |  |  |  |  |  |  |  |  |  |  |
| R2 | .006 | .043 |  |  |  |  |  |  |  |  |  |  |
| Adjusted R2 | -.014 | .023 |  |  |  |  |  |  |  |  |  |  |
| *F (p)* | 0.310  (.580) | 2.157  (.149) |  |  |  |  |  |  |  |  |  |  |

Notations: ‘.’ for *p<.1*, ‘*’ for *p<.05*, ‘**’ for *p<.01* and ‘***’ for *p<.001*.

Table S5. Linear regression outcomes for week-based leave-out estimators for topics related to political issues.

|  | 1.people|opinion|  understand|point|question | | 2.yall|lol|shit|guy|fuck | | 3.day|wait|time|hour|sleep | | 4.game|player|team|play|  football | | 5.market|company|climate|industry|technology | | 6.book|movie|read|  write|film | |
| --- | --- | --- | --- | --- | --- | --- | --- | --- | --- | --- | --- | --- |
|  | **include rt** | **exclude rt** | **include rt** | **exclude rt** | **include rt** | **exclude rt** | **include rt** | **exclude rt** | **include rt** | **exclude rt** | **include rt** | **exclude rt** |
| Intercept *β0* | .526 | .511 | .521 | .512 | .517 | .510 | .517 | .510 | .521 | .511 | .515 | .510 |
|  | (.002) | (4.115e-04) | (.001) | (4.656e-04) | (.001) | (.001) | (.002) | (.001) | (.003) | (.001) | (.001) | (.001) |
| *β1* | **1.111e-04*** | **3.476e-05*** | **1.543e-04**** | **8.301e-05***** | **2.827e-04***** | **1.148e-04***** | 1.036e-04 | 4.351e-05 | **2.660e-04**** | **4.571e-05*** | **2.412e-04***** | **8.078e-05***** |
|  | (5.173e-05) | (1.404e-05) | (4.859e-05) | (1.589e-05) | (4.544e-05) | (1.768e-05) | (8.017e-05) | (3.063e-05) | (9.132e-05) | (2.251e-05) | (3.767e-05) | (1.899e-05) |
| R2 | .088 | .113 | .174 | .363 | .445 | .468 | .033 | .040 | .150 | .080 | .461 | .274 |
| Adjusted R2 | .069 | .095 | .156 | .349 | .434 | .456 | .014 | .020 | .133 | .060 | .449 | .259 |
| *F (p)* | 4.616  (.037) | 6.127  (.017) | 10.087 (.003) | 27.293 (<.001) | 38.521 (<.001) | 42.145 (<.001) | 1.674  (.202) | 2.018  (.162) | 8.483  (.005) | 4.123  (.048) | 40.983  (<.001) | 18.103  (<.001) |

|  | 7.love|happy|family|happybirthday|beautiful | | 8.wear|dog|hair|cat|mask | | 9.car|park|driver|  drive|truck | | 10.john|michael|king|  david|taylor | | 11.twitter|retweet|account|tweet|post | | 12.join|event|virtual|  host|register | |
| --- | --- | --- | --- | --- | --- | --- | --- | --- | --- | --- | --- | --- |
|  | **include rt** | **exclude rt** | **include rt** | **exclude rt** | **include rt** | **exclude rt** | **include rt** | **exclude rt** | **include rt** | **exclude rt** | **include rt** | **exclude rt** |
| Intercept *β0* | .526 | .518 | .524 | .512 | .533 | .513 | .540 | .519 | .560 | .513 | .515 | .510 |
|  | (.003) | (.002) | (.002) | (.001) | (.003) | (.001) | (.003) | (.001) | (.006) | (.002) | (.002) | (1.047e-03) |
| *β1* | **4.166e-04***** | **2.427e-04**** | **1.959e-04**** | **1.161e-04***** | **4.680e-04***** | 7.965e-05. | **3.158e-04**** | **1.787e-04***** | **6.387e-04**** | **4.617e-04***** | **6.035e-04***** | **1.581e-04***** |
|  | (1.064e-04) | (6.980e-05) | (6.972e-05) | (2.495e-05) | (1.163e-04) | (4.092e-05) | (1.043e-04) | (3.820e-05) | (2.171e-04) | (7.453e-05) | (8.112e-05) | (3.573e-05) |
| R2 | .242 | .201 | .141 | .311 | .252 | .073 | .161 | .313 | .153 | .444 | .535 | .290 |
| Adjusted R2 | .226 | .185 | .123 | .296 | .237 | .054 | .143 | .299 | .135 | .433 | .526 | .275 |
| *F (p)* | 15.315  (<.001) | 12.090  (.001) | 7.892  (.007) | 21.646  (<.001) | 16.189  (<.001) | 3.789  (.057) | 9.177  (.004) | 21.883  (<.001) | 8.652  (.005) | 38.374  (<.001) | 55.337  (<.001) | 19.590  (<.001) |

|  | 13.god|jesus|lord|  pray|church | | 14.school|student|teacher|college|teach | | 15.postphoto|coast|storm|  san|lake | | 16.eat|food|drink|chicken|  coffee | |  | |  | |
| --- | --- | --- | --- | --- | --- | --- | --- | --- | --- | --- | --- | --- |
|  | **include rt** | **exclude rt** | **include rt** | **exclude rt** | **include rt** | **exclude rt** | **include rt** | **exclude rt** |  |  |  |  |
| Intercept *β0* | .534 | .512 | .530 | .513 | .530 | .512 | .528 | .515 |  |  |  |  |
|  | (.004) | (.001) | (.004) | (.001) | (.003) | (.001) | (.003) | (.001) |  |  |  |  |
| *β1* | **4.274e-04**** | **1.725e-04***** | **6.081e-04***** | **1.490e-04**** | **1.808e-04*** | 5.939e-05. | 6.326e-05 | -7.496e-06 |  |  |  |  |
|  | (1.431e-04) | (4.159e-05) | (1.234e-04) | (4.278e-05) | (8.643e-05) | (2.960e-05) | (9.358e-05) | (3.025e-05) |  |  |  |  |
| R2 | .155 | .264 | .336 | .202 | .084 | .077 | .009 | .001 |  |  |  |  |
| Adjusted R2 | .138 | .249 | .322 | .185 | .064 | .058 | -.011 | -.020 |  |  |  |  |
| *F (p)* | 8.815  (.005) | 17.120  (<.001) | 24.300  (<.001) | 12.130  (<.001) | 4.375  (.042) | 4.027  (.050) | 0.457  (.052) | 0.061  (.805) |  |  |  |  |

Notations: ‘.’ for *p<.1*, ‘*’ for *p<.05*, ‘**’ for *p<.01* and ‘***’ for *p<.001*.

Table S6. Linear regression outcomes for week-based leave-out estimators for topics related to non-political issues.


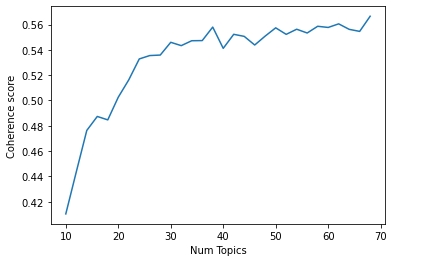


Figure S1. Coherence scores calculated from 10% of tweets.


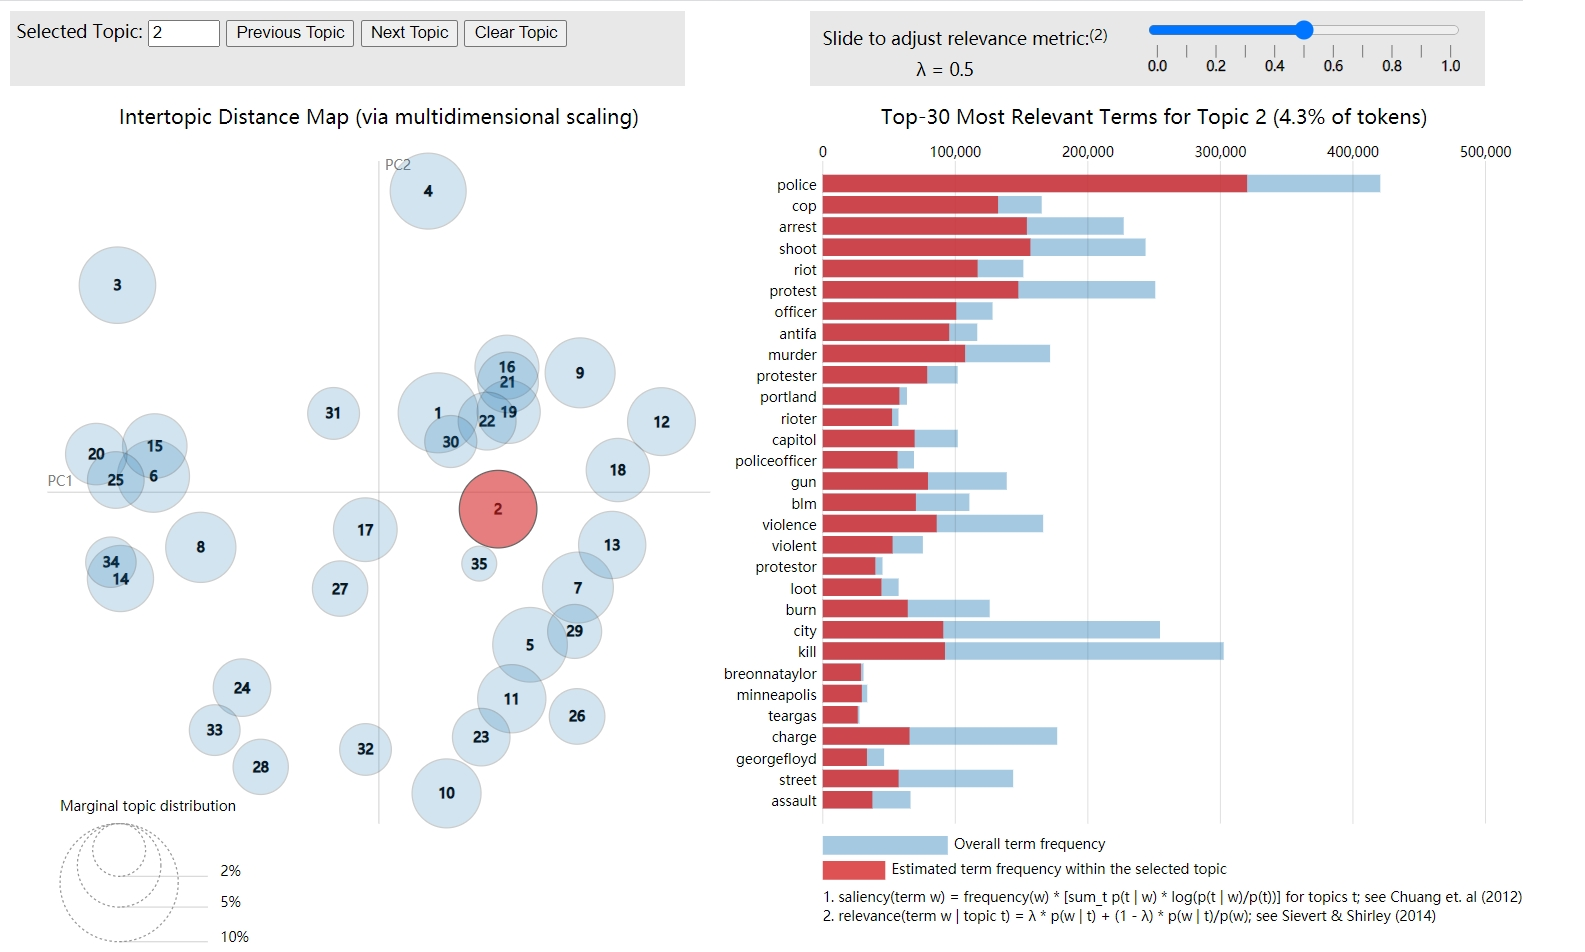


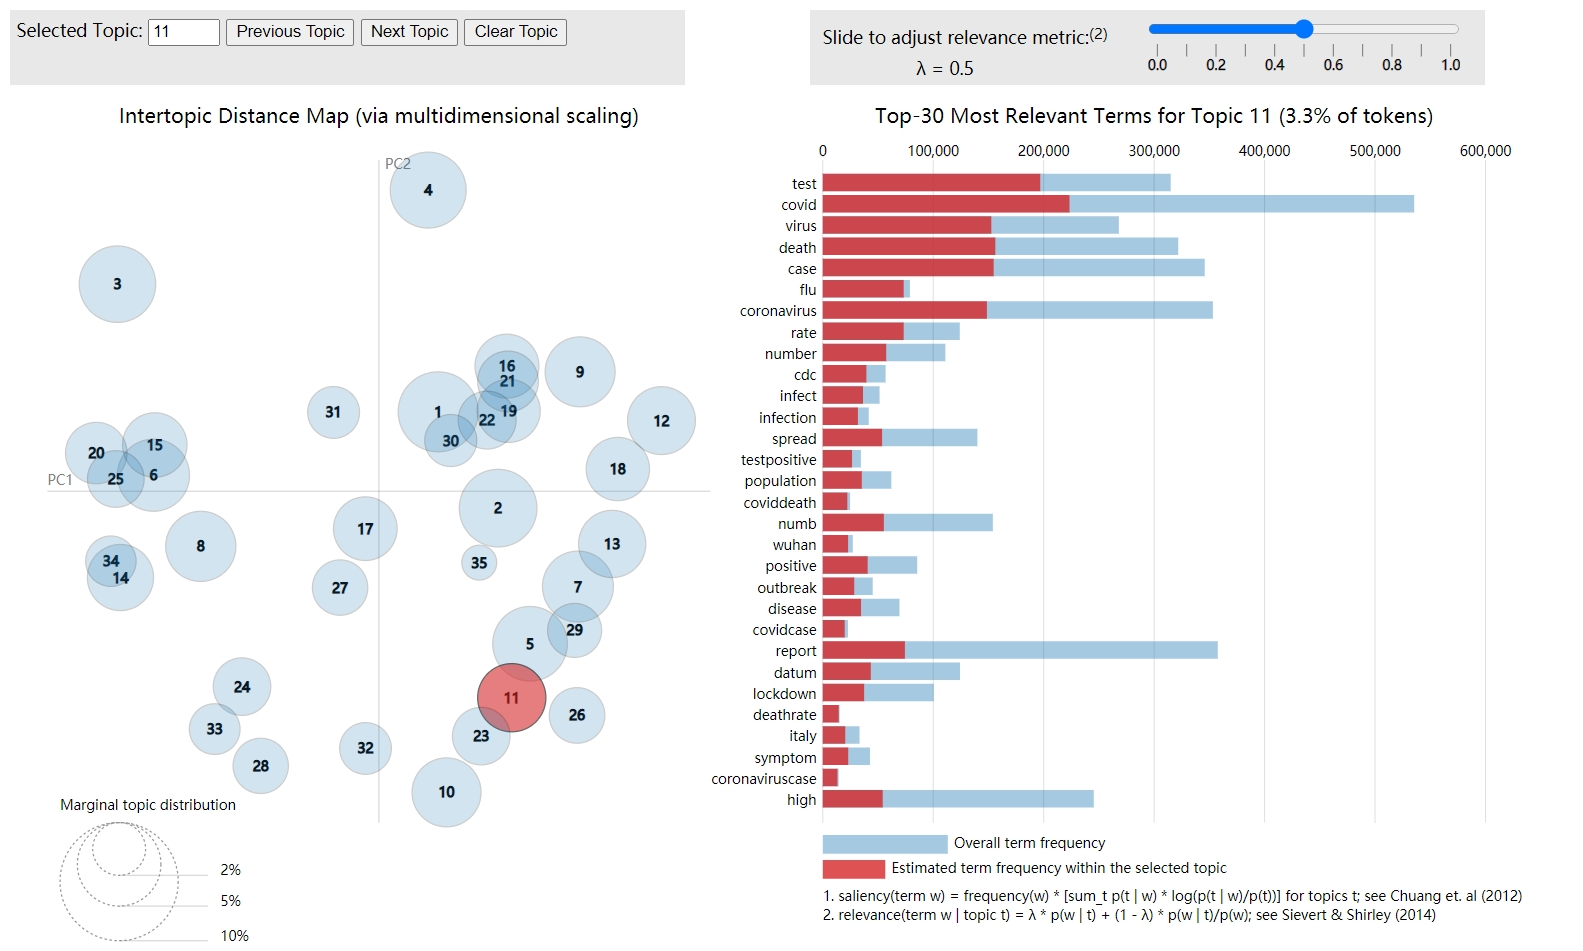


Figure S2. Visualization of topic modeling conclusion for two estimated topics about protest activities and the COVID-19 crisis.


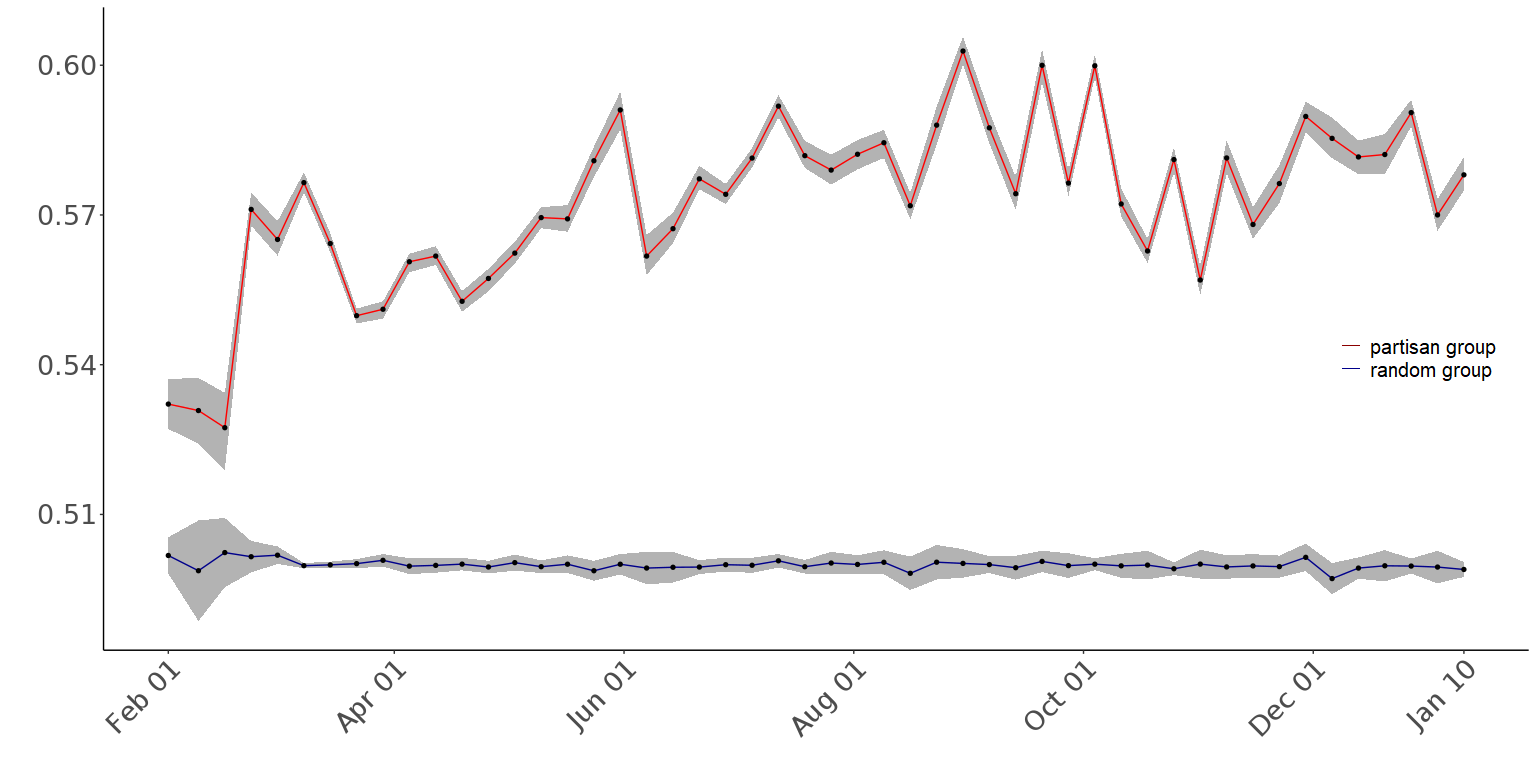


Figure S3. Leave-out estimator for the test|covid|virus|death|case topic when Twitter users are classified to their partisan (random) groups.


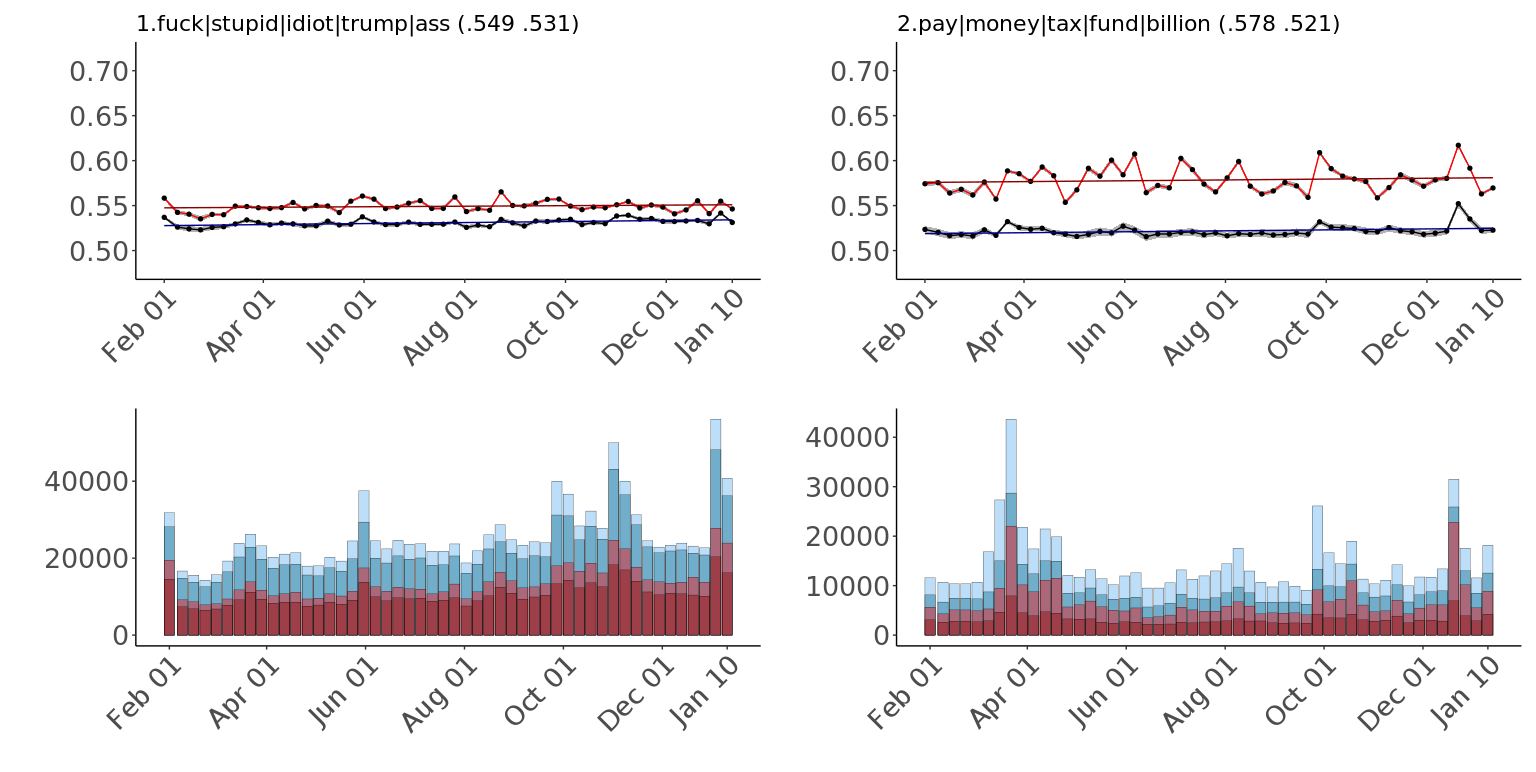


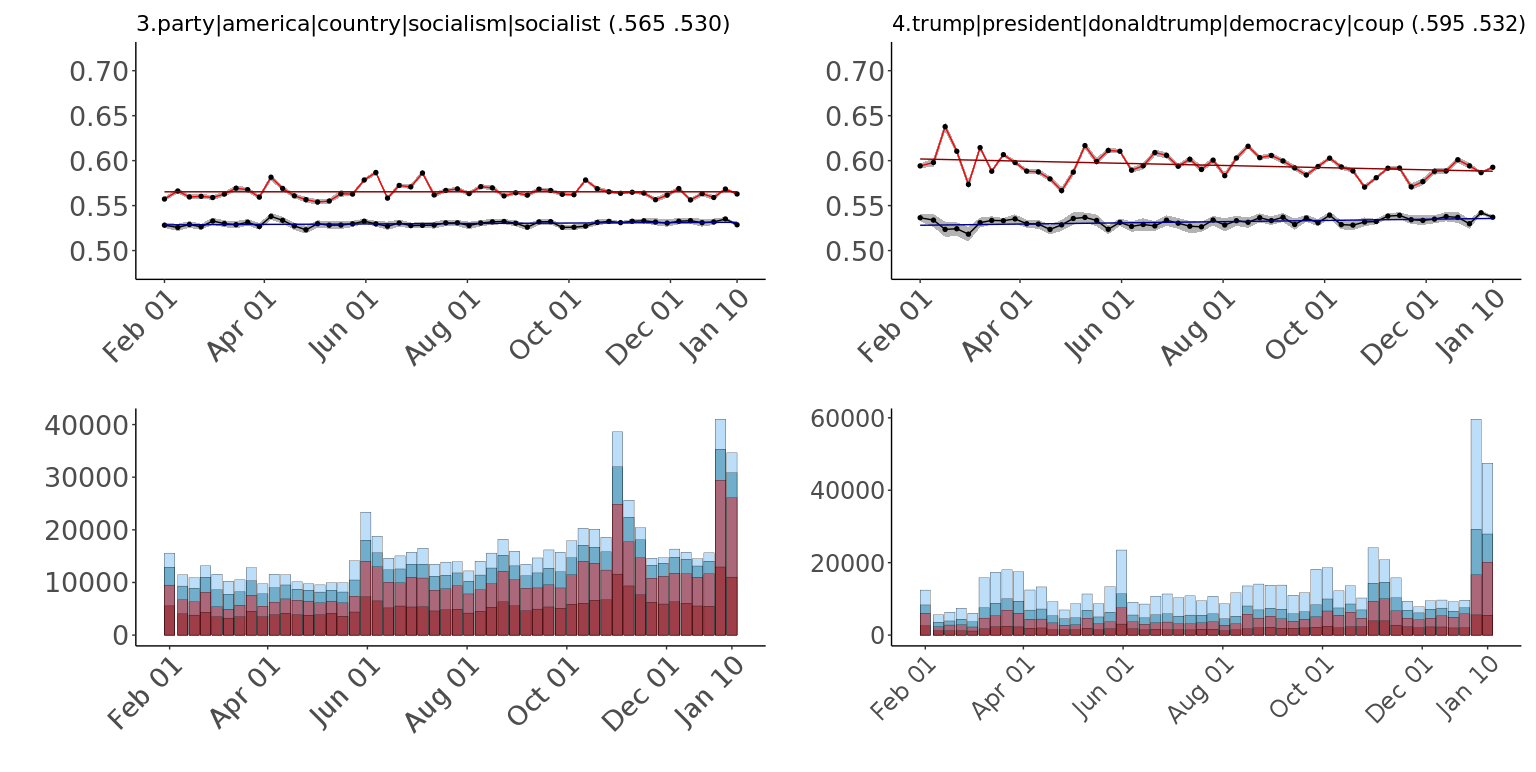


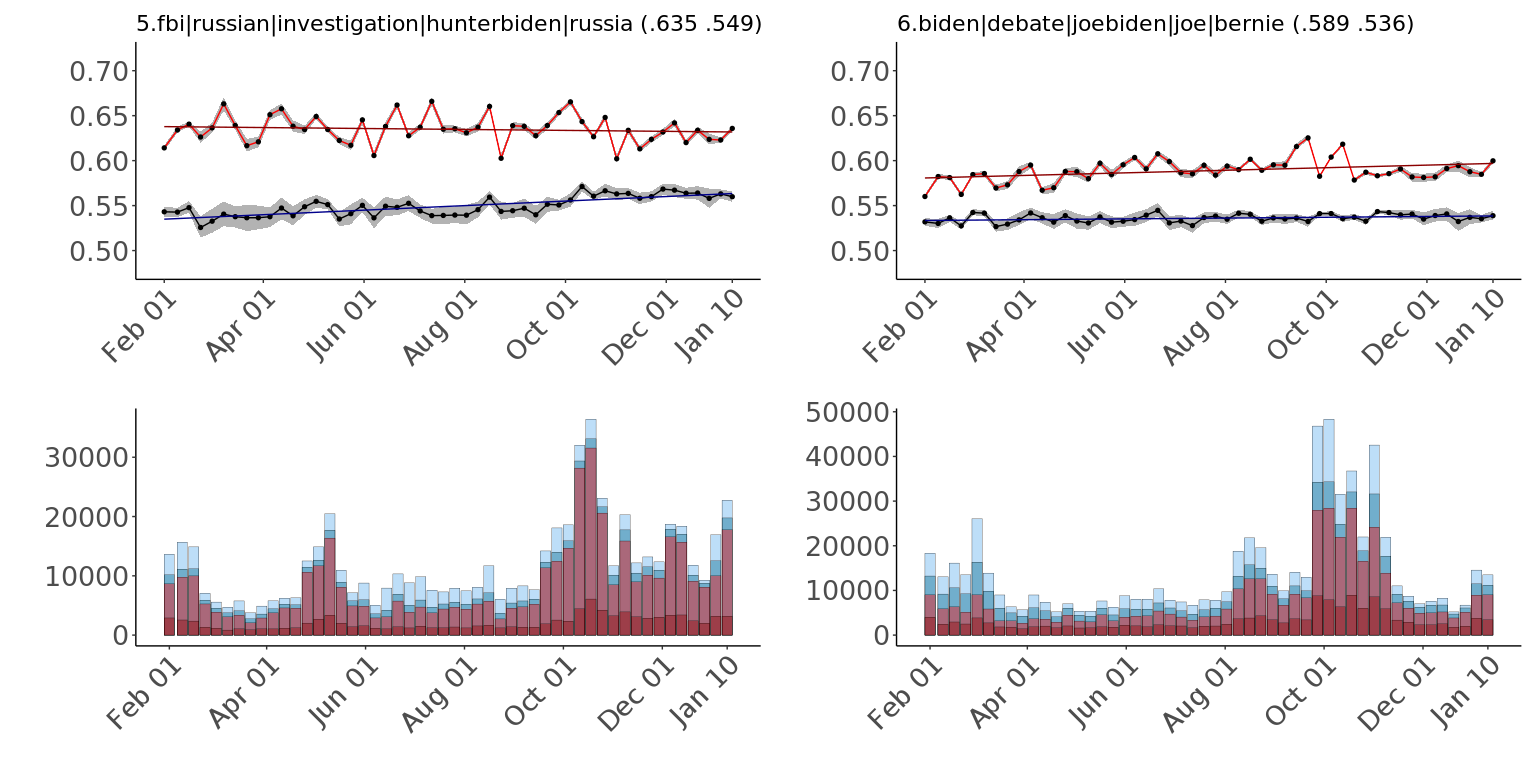


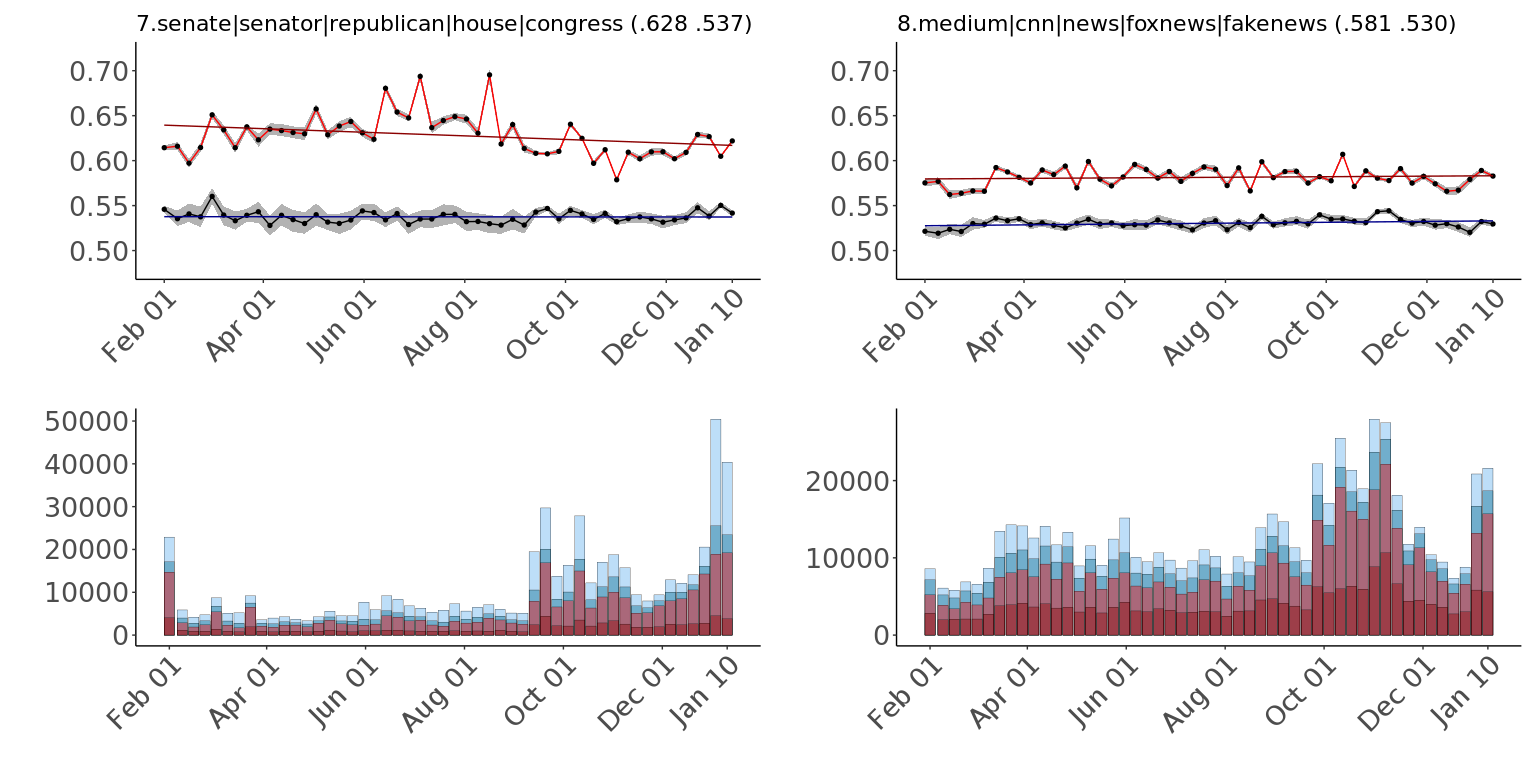


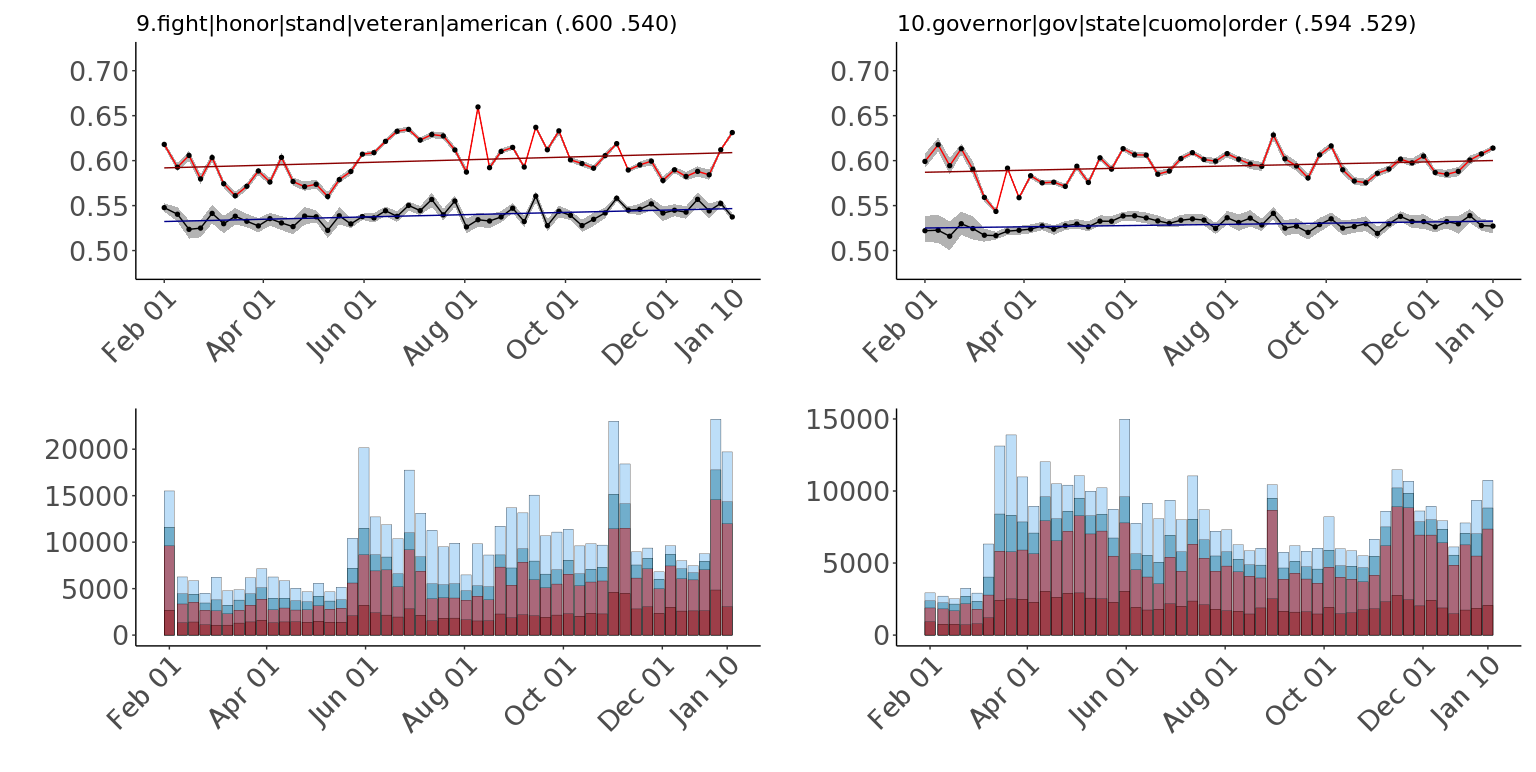


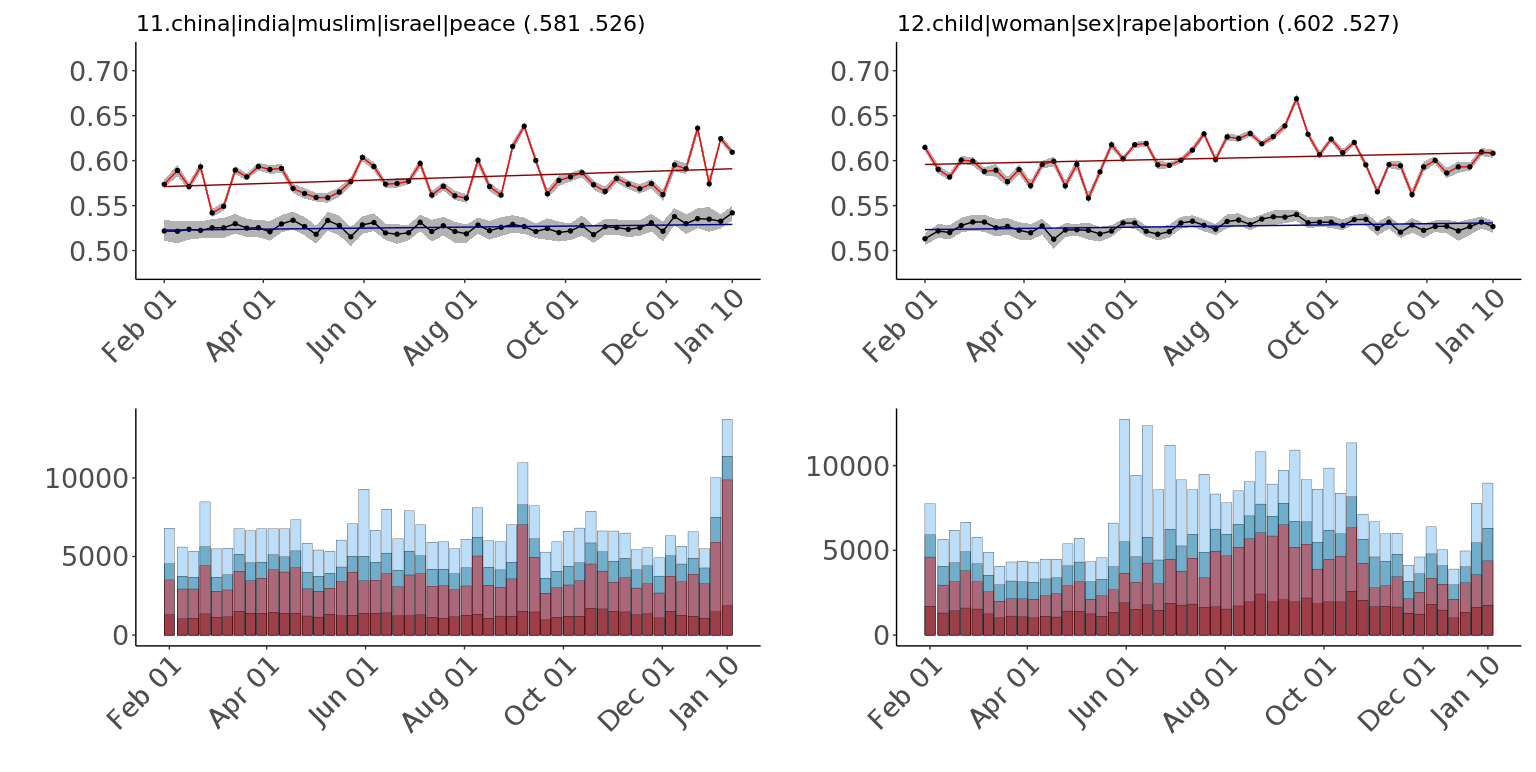


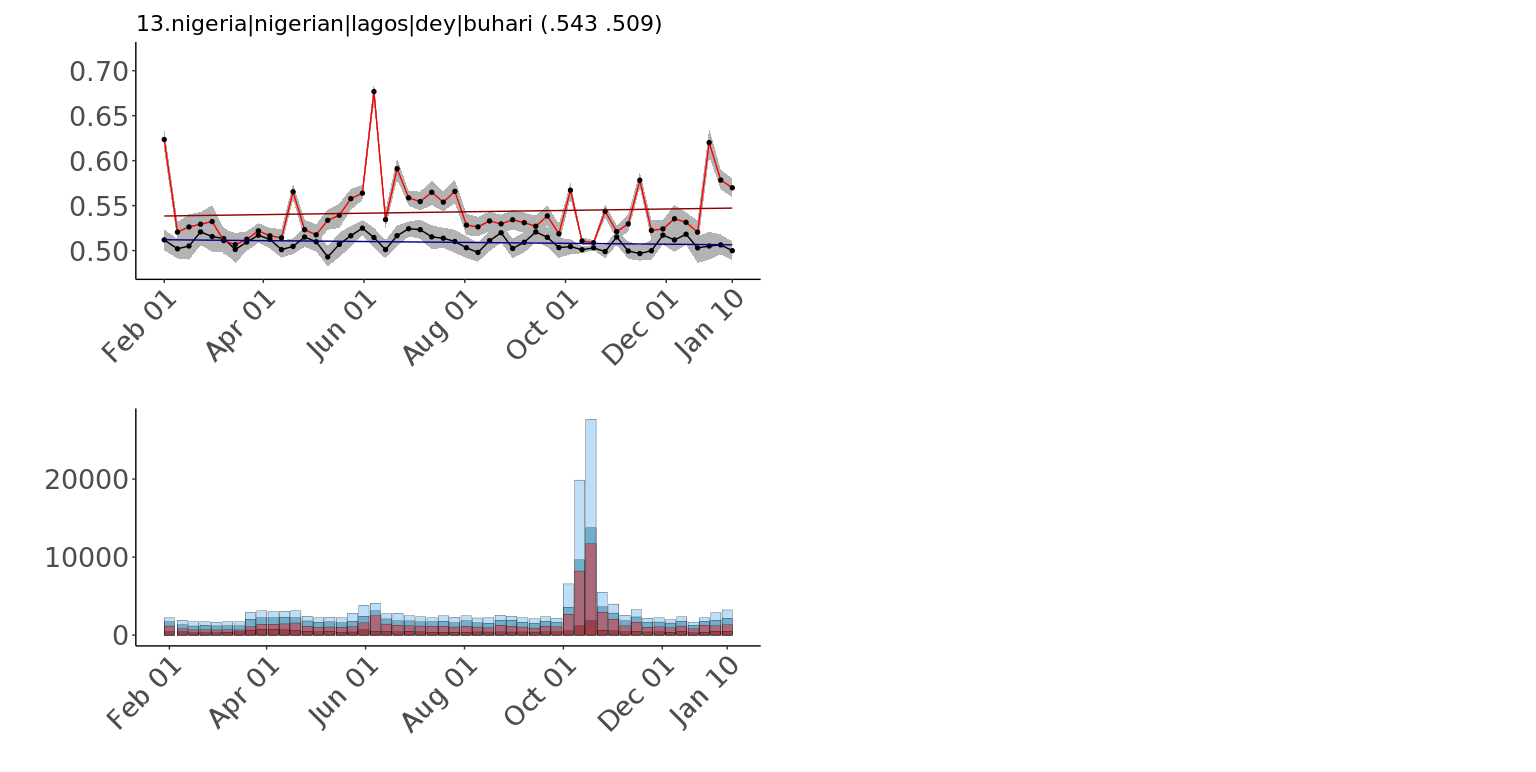


Figure S4. Week-based changes for polarizations and popularities of political topics.


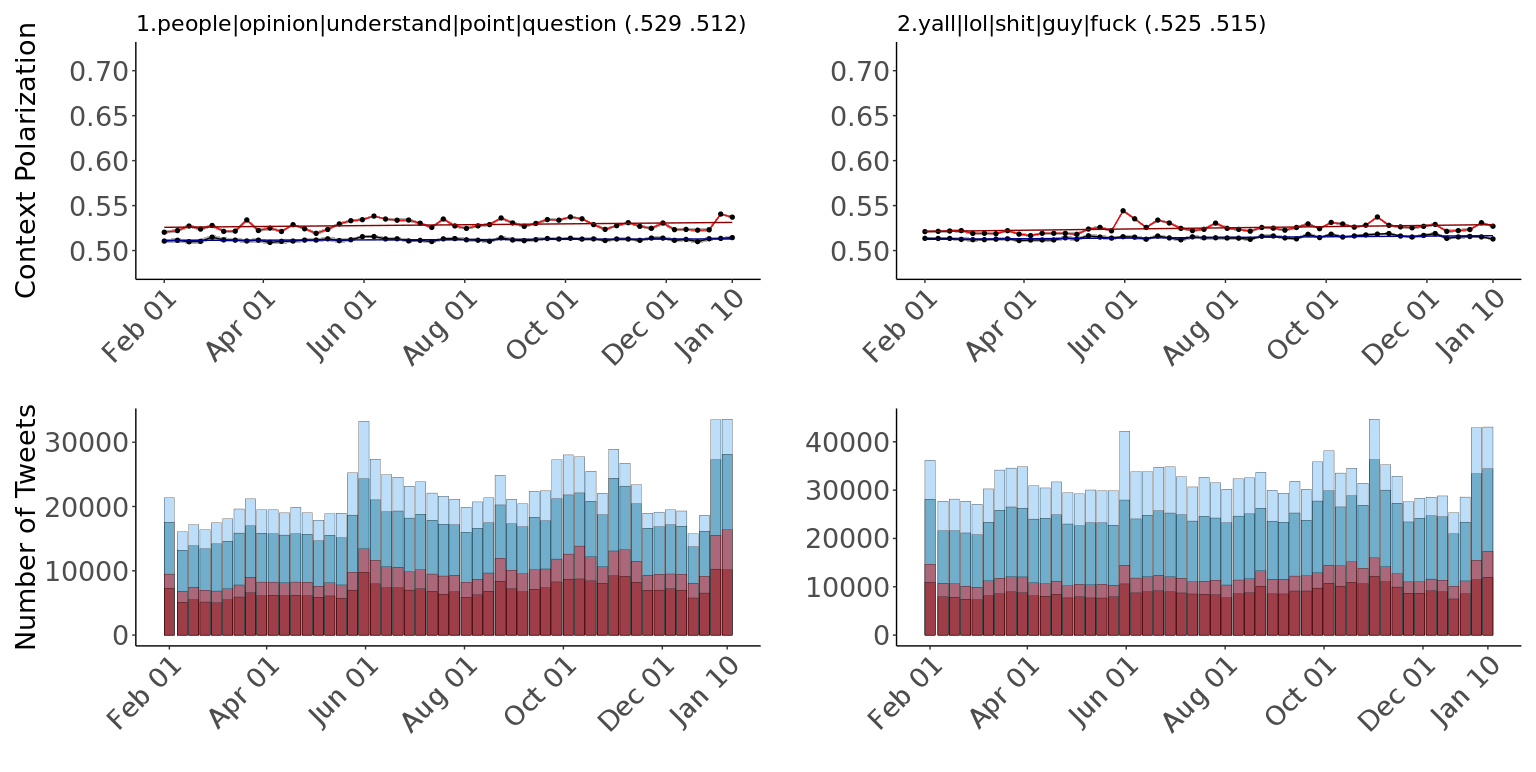


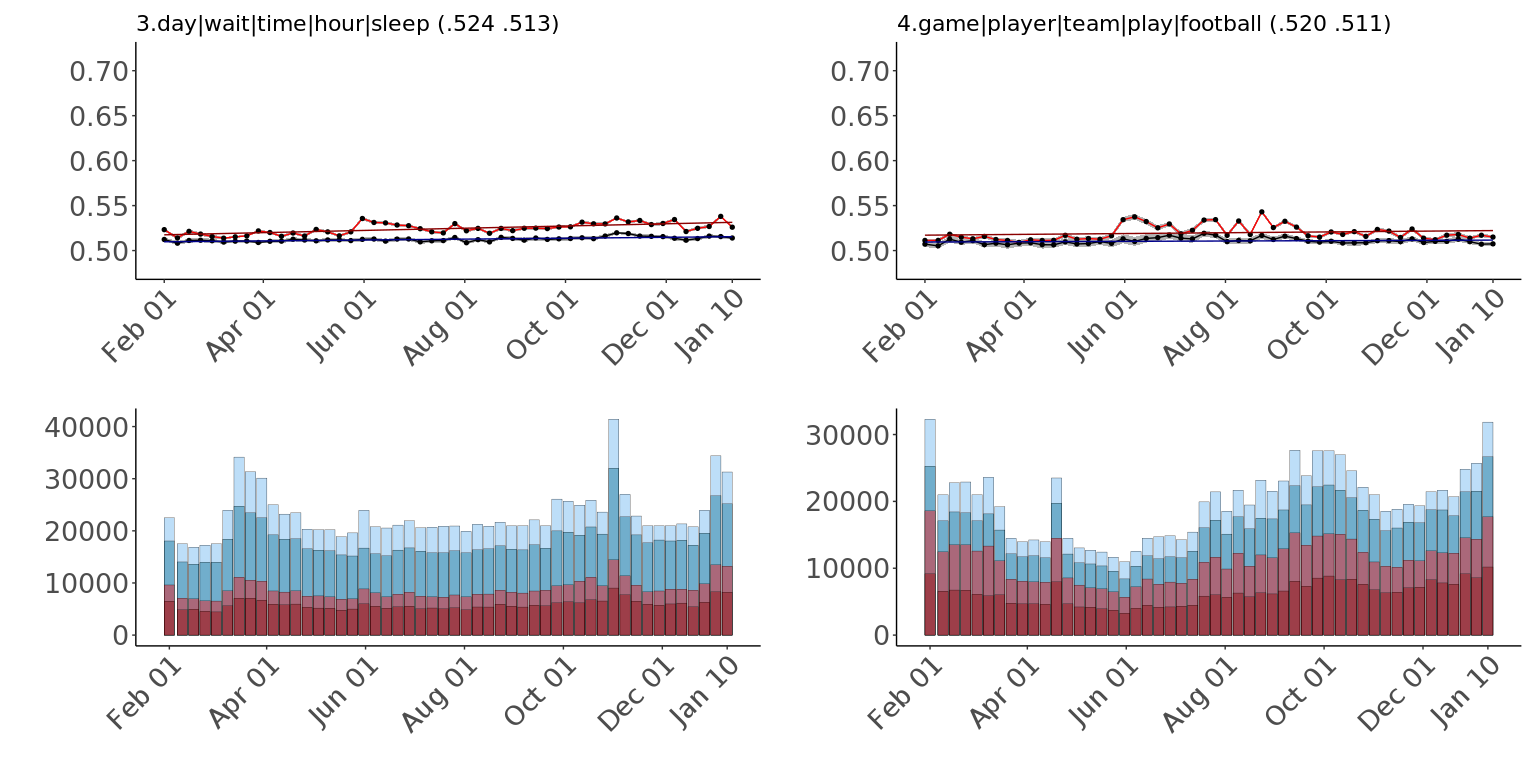


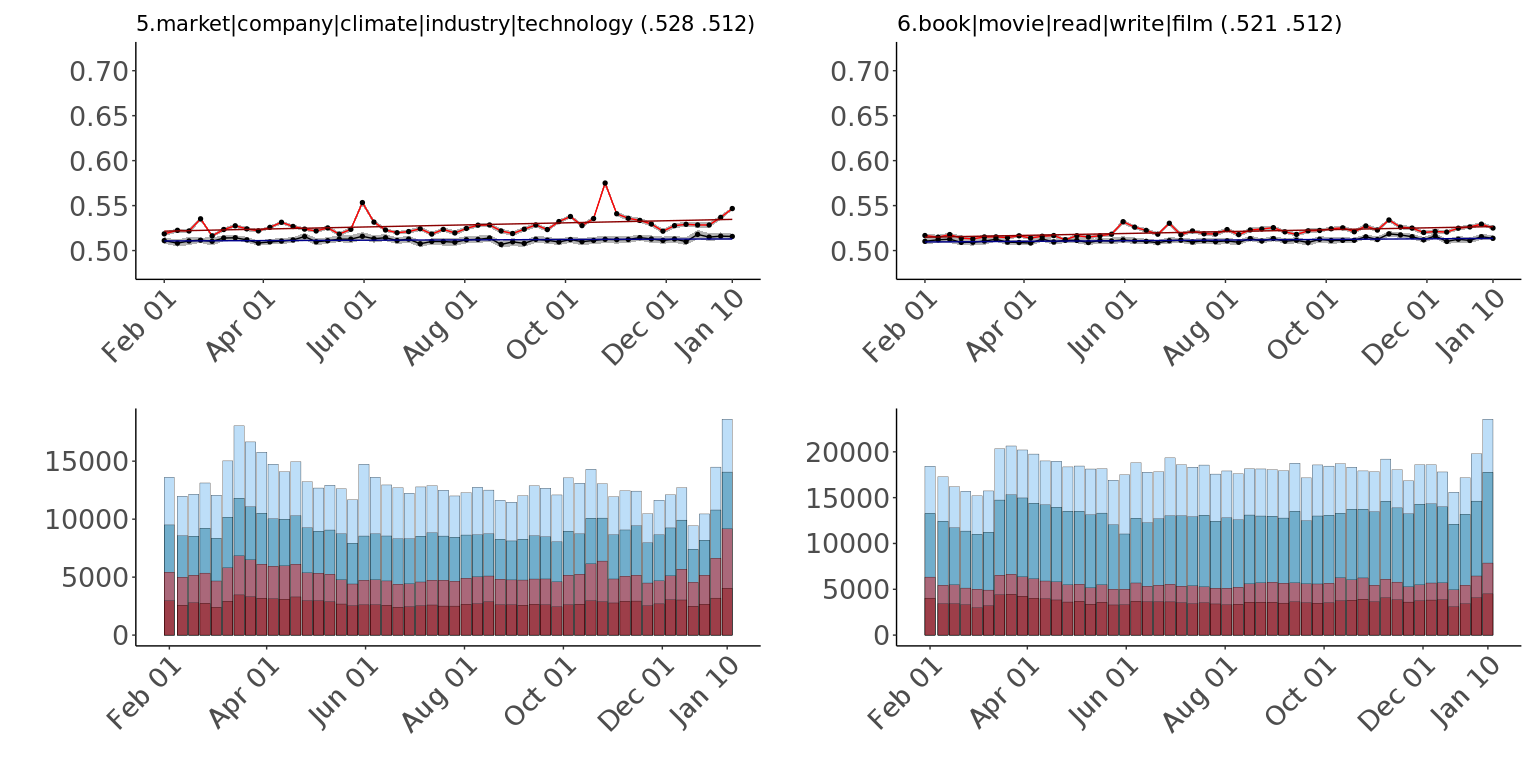


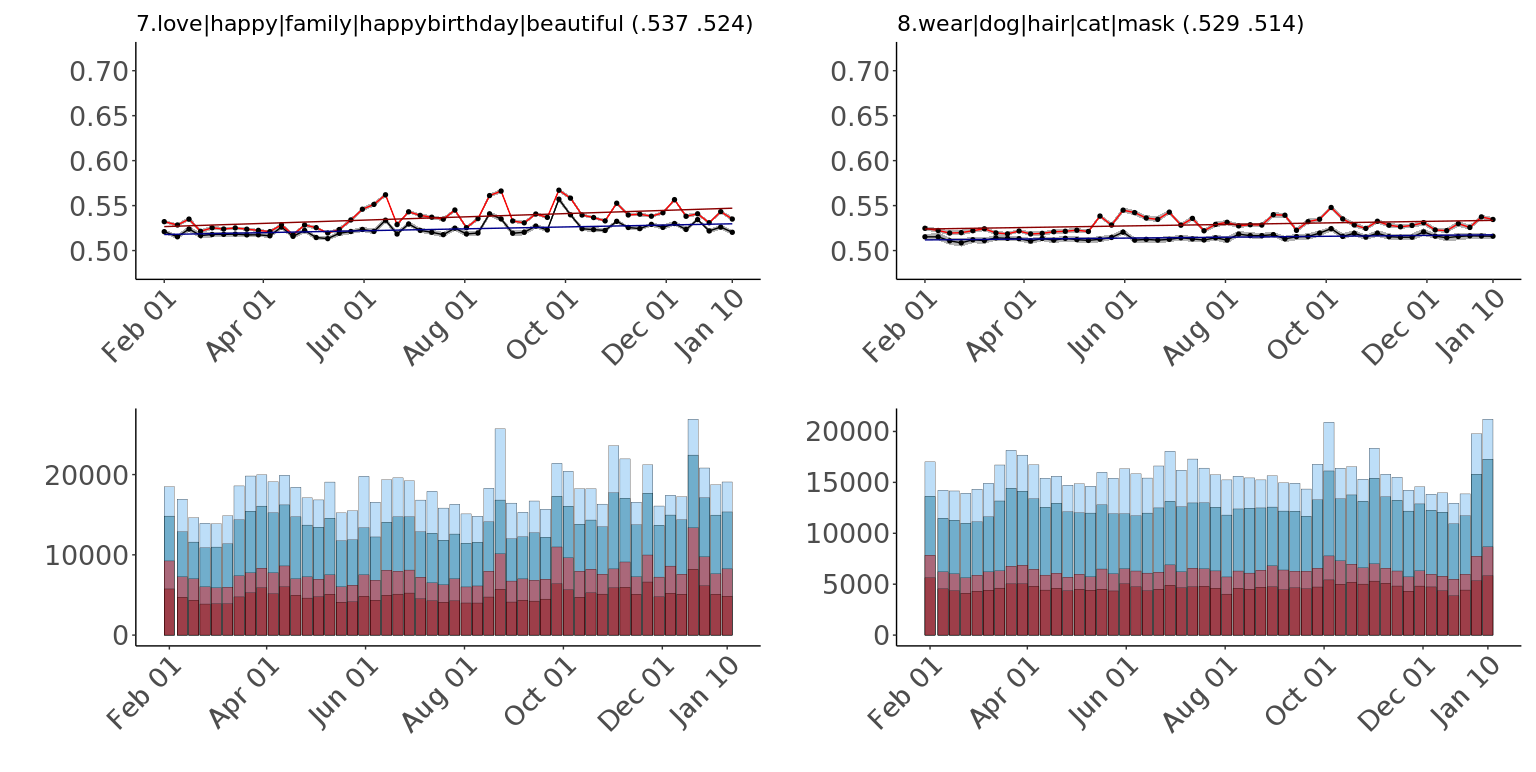


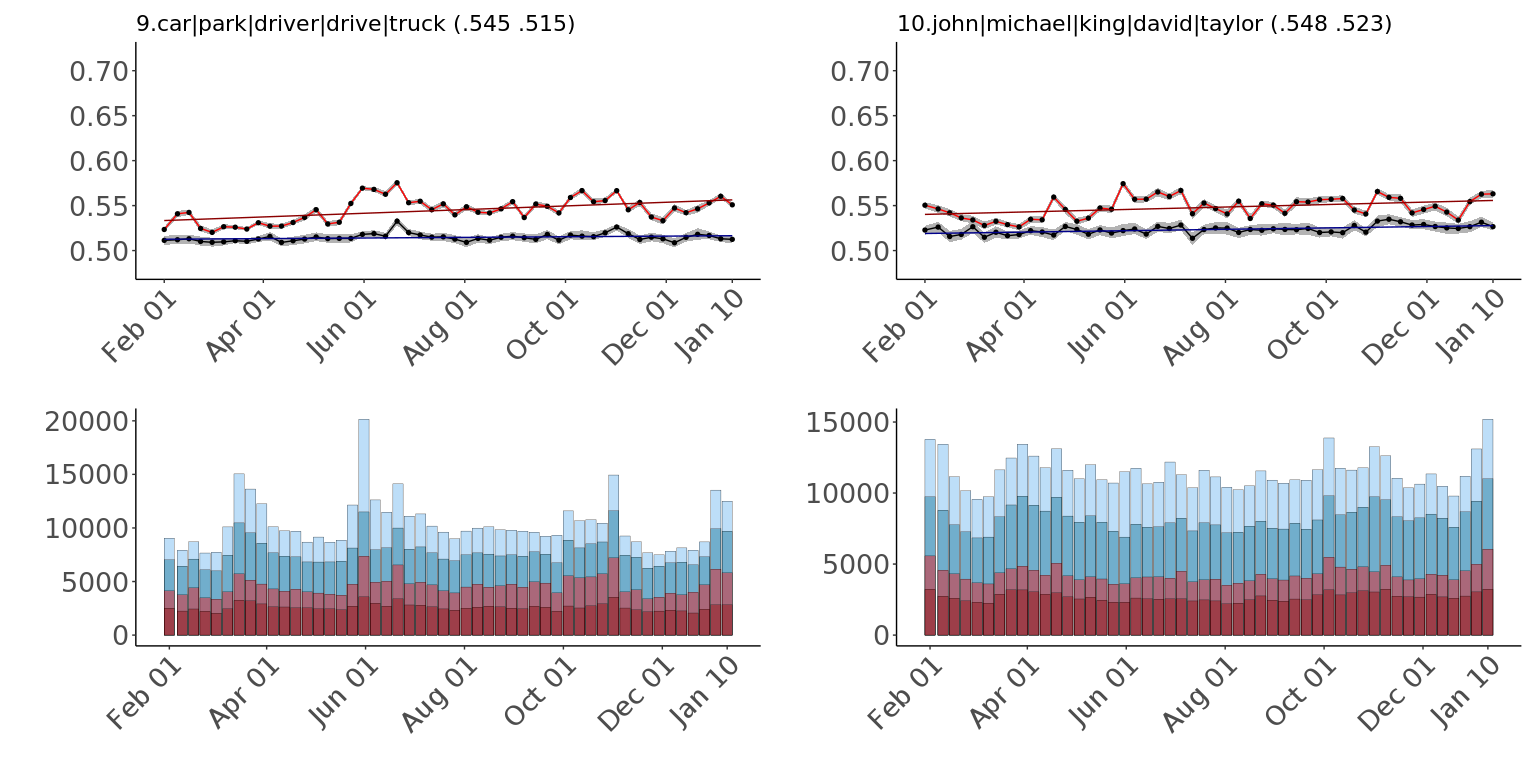


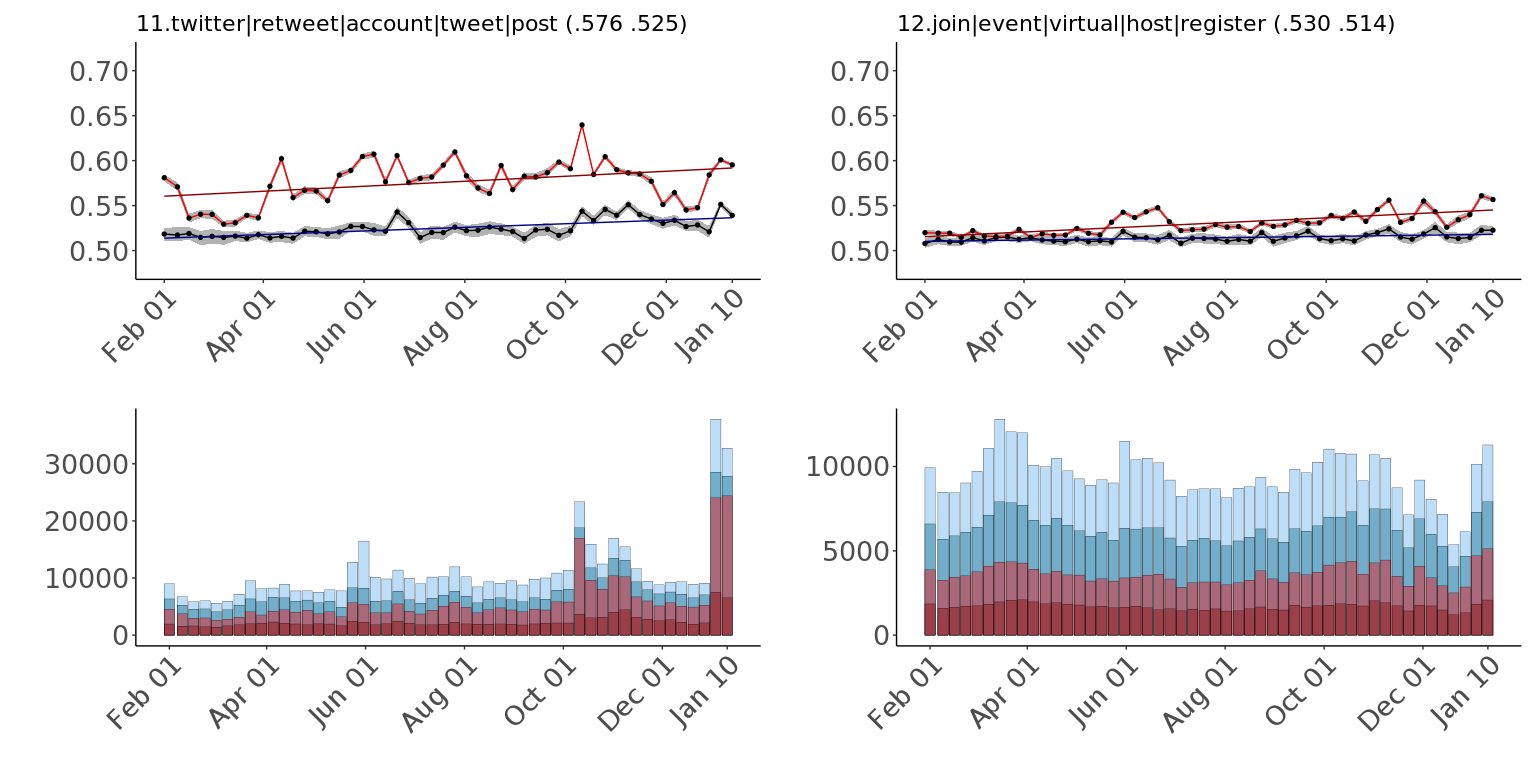


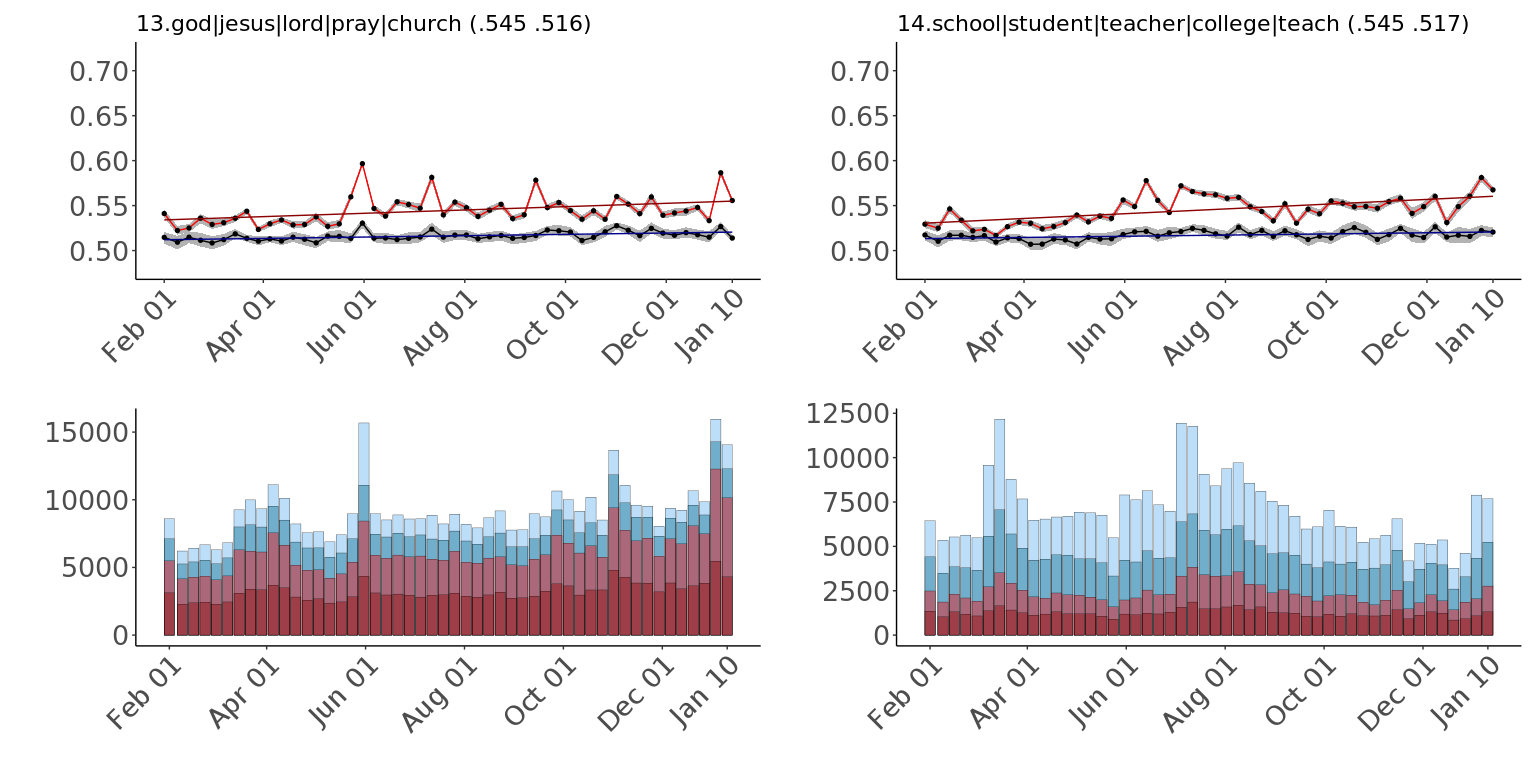


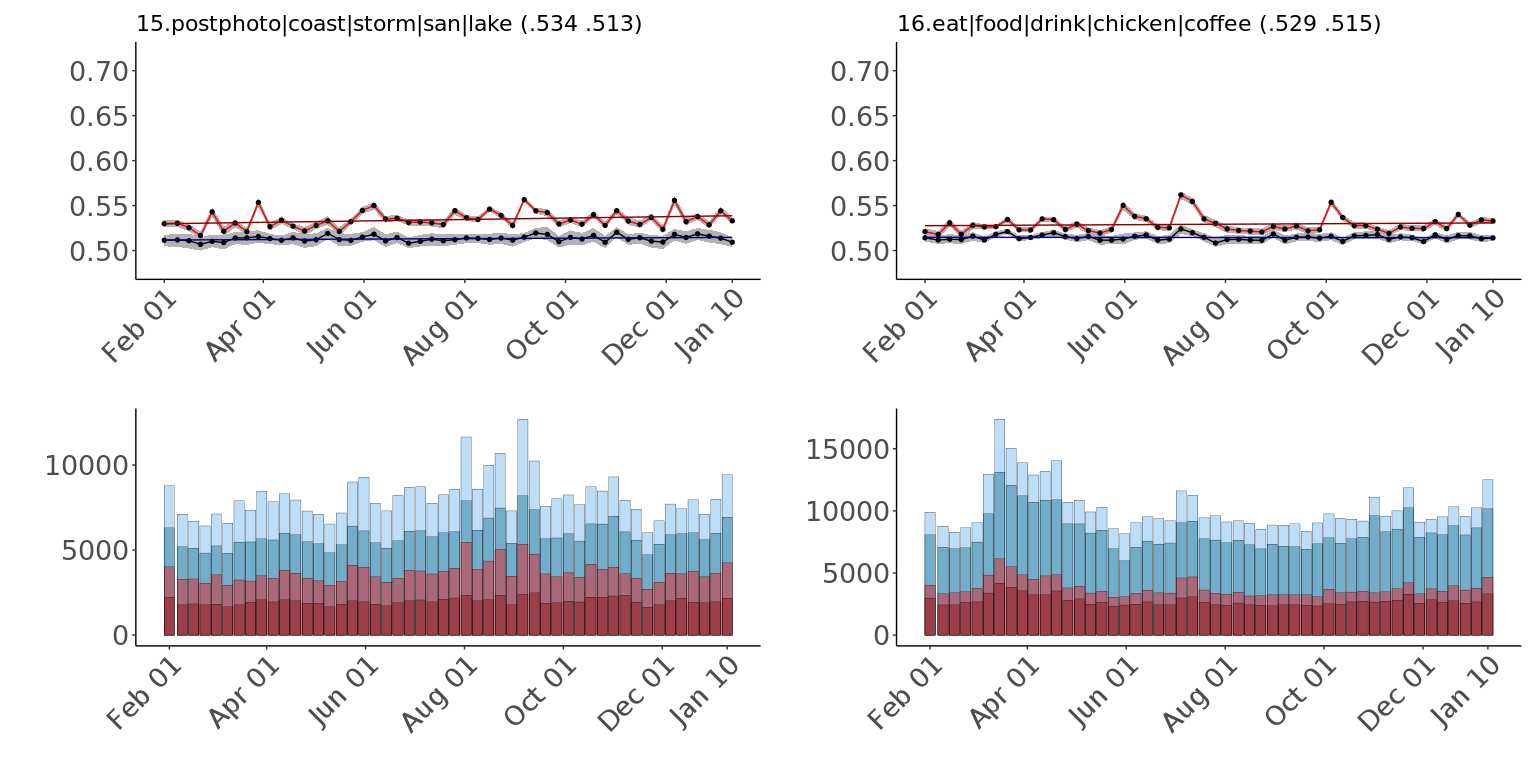


Figure S5. Week-based changes for polarizations and popularities of non-political topics.


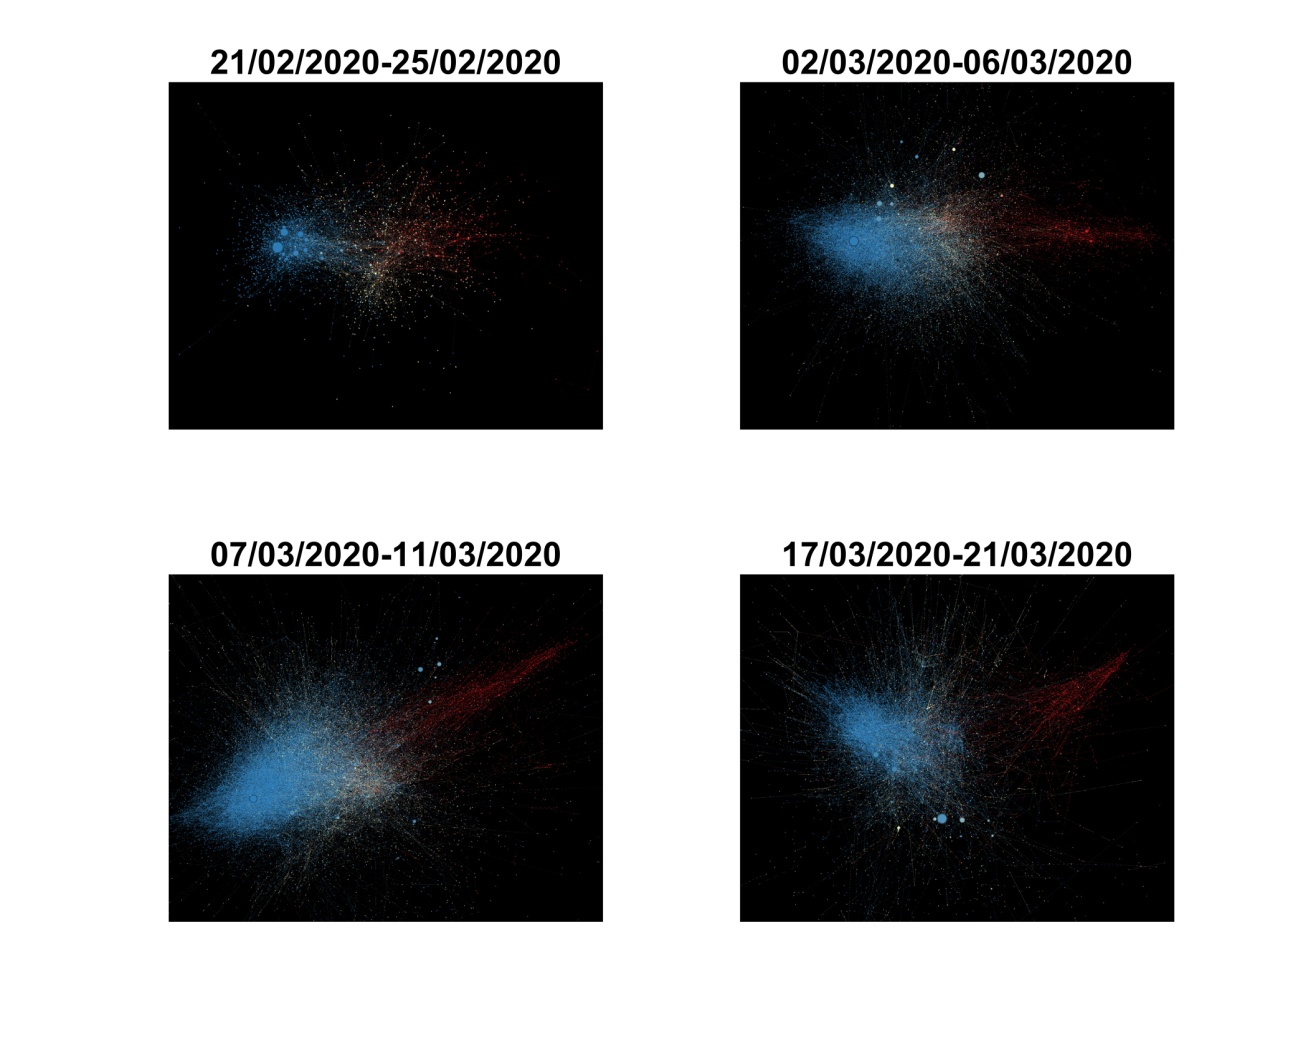

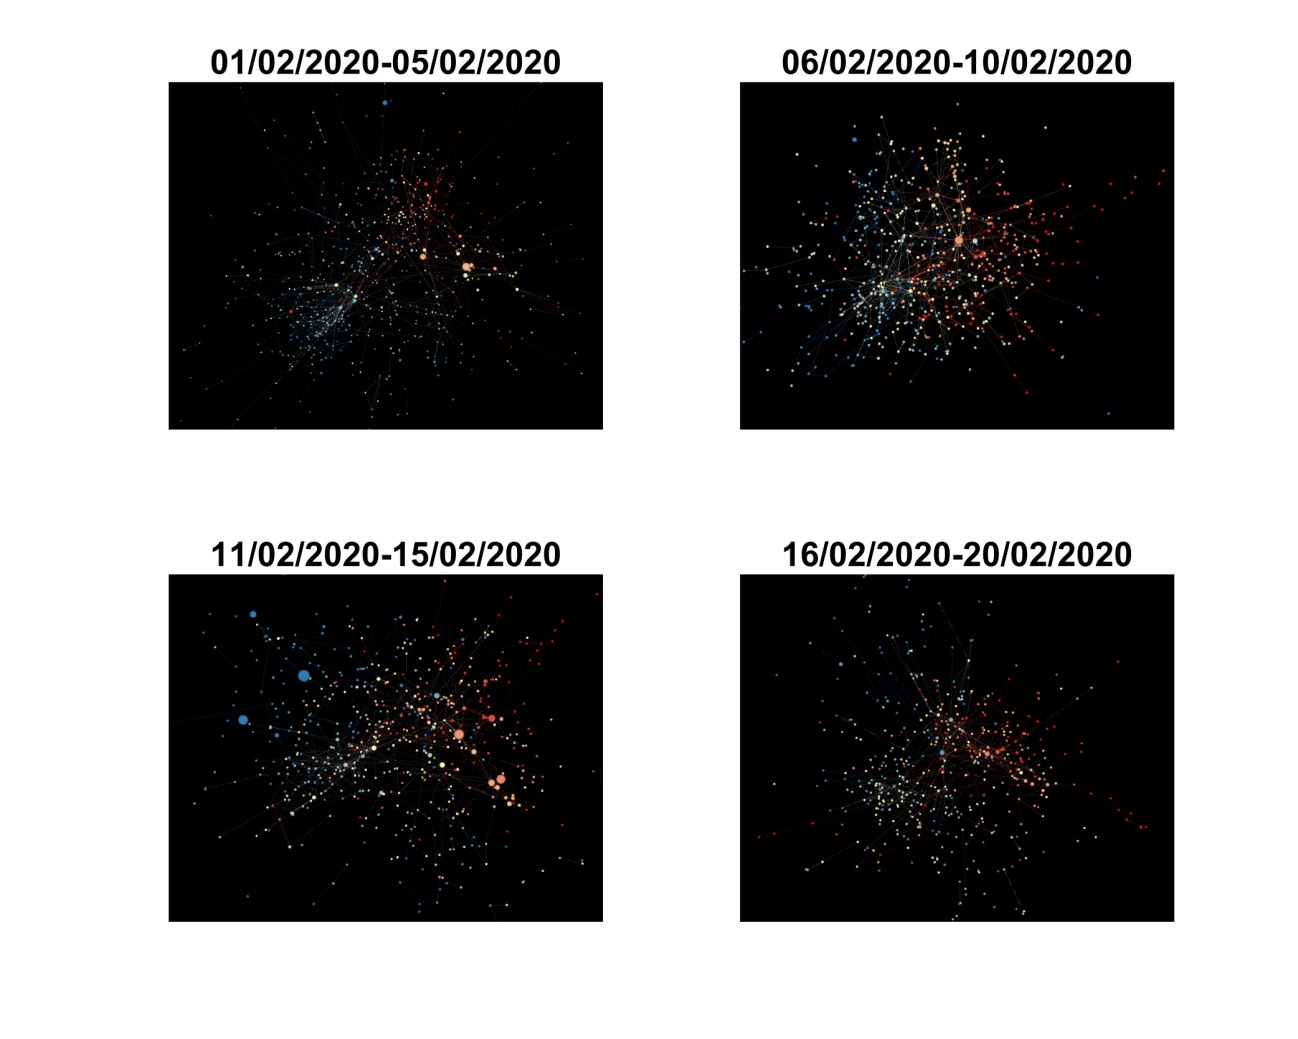


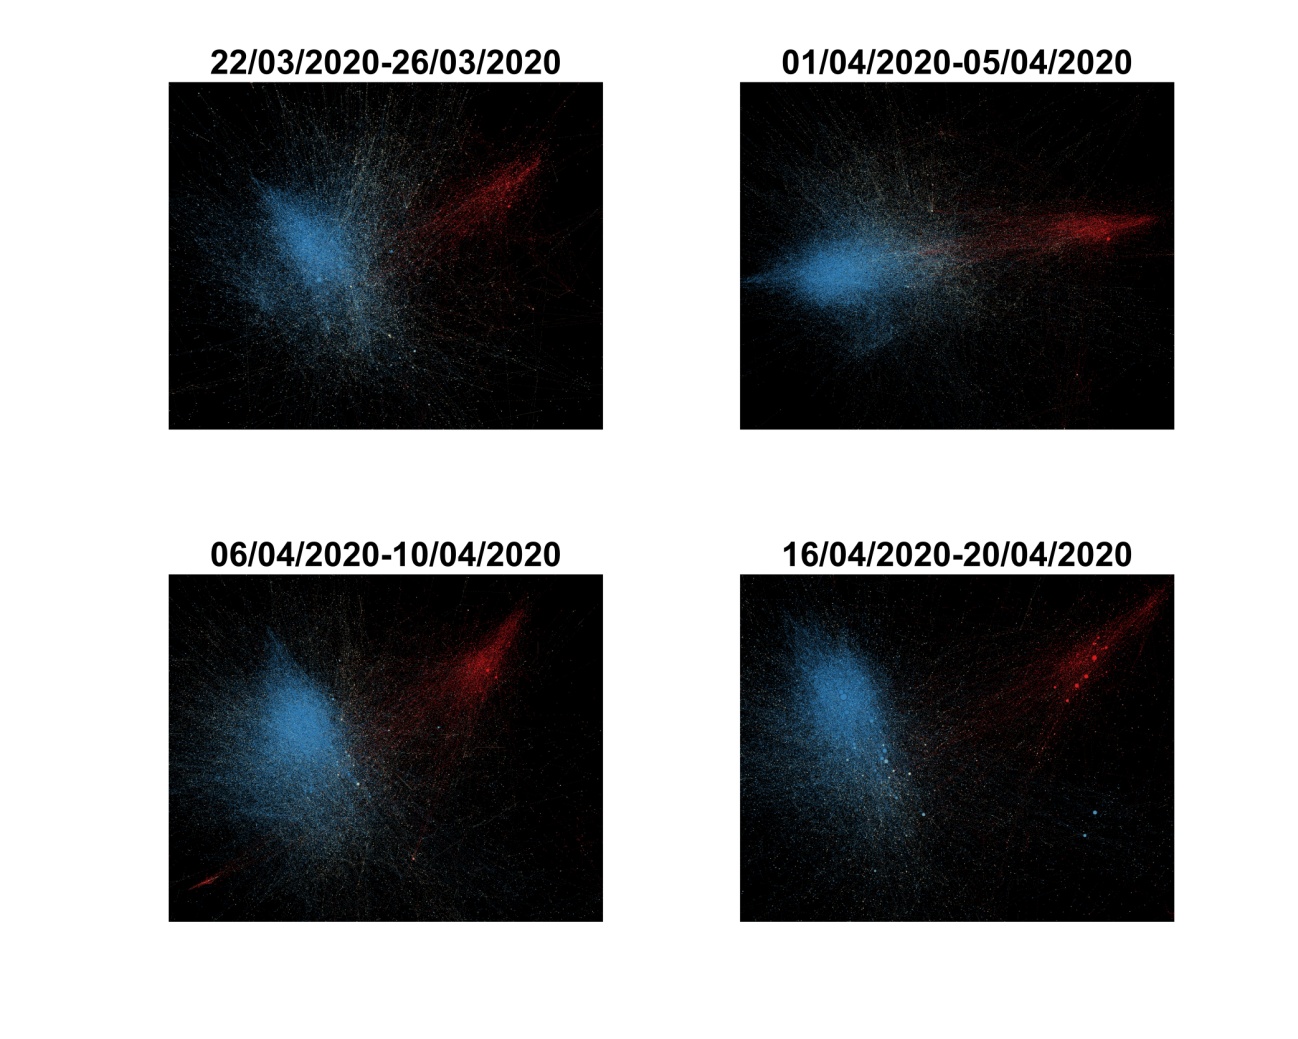


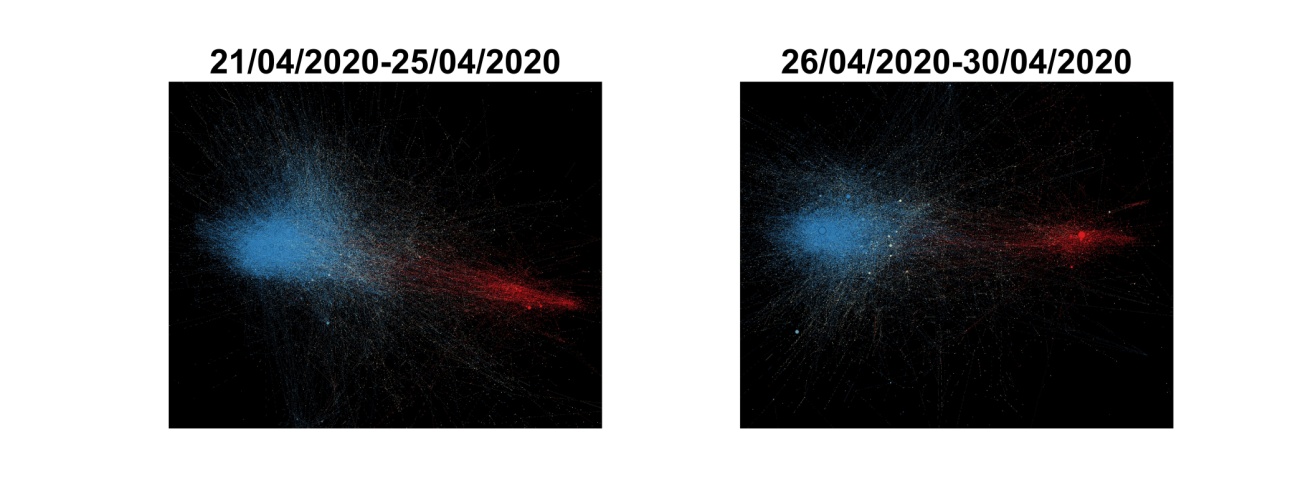


Figure S6. Structure of retweet networks. The title for each subplot gives the time interval.
